# Supplementary material for: SisterTalk: final results of a culturally tailored cable television delivered weight control program for Black women
Source: Springer Nature journal article supplement (doi:10.1186/1479-5868-10-141), 2013-12-01
Supplement: 12966_2012_828_MOESM1_ESM.pdf [file 12966_2012_828_MOESM1_ESM.pdf]

## TELEPHONE SUPPORT

CABLE TV

|                      | Telephone Support (TS) | No Telephone Support |
|----------------------|------------------------|----------------------|
| Interactive TV (ITV) | ITV + TS<br>n=73       | ITV<br>n=64          |
| Passive TV (PTV)     | PTV + TS<br>n=73       | PTV<br>n=71          |

Wait-list/Attention Placebo

Comparison Group

n=82
