# Supplementary material for: SisterTalk: final results of a culturally tailored cable television delivered weight control program for Black women
Source: Springer Nature journal article supplement (doi:10.1186/1479-5868-10-141), 2013-12-01

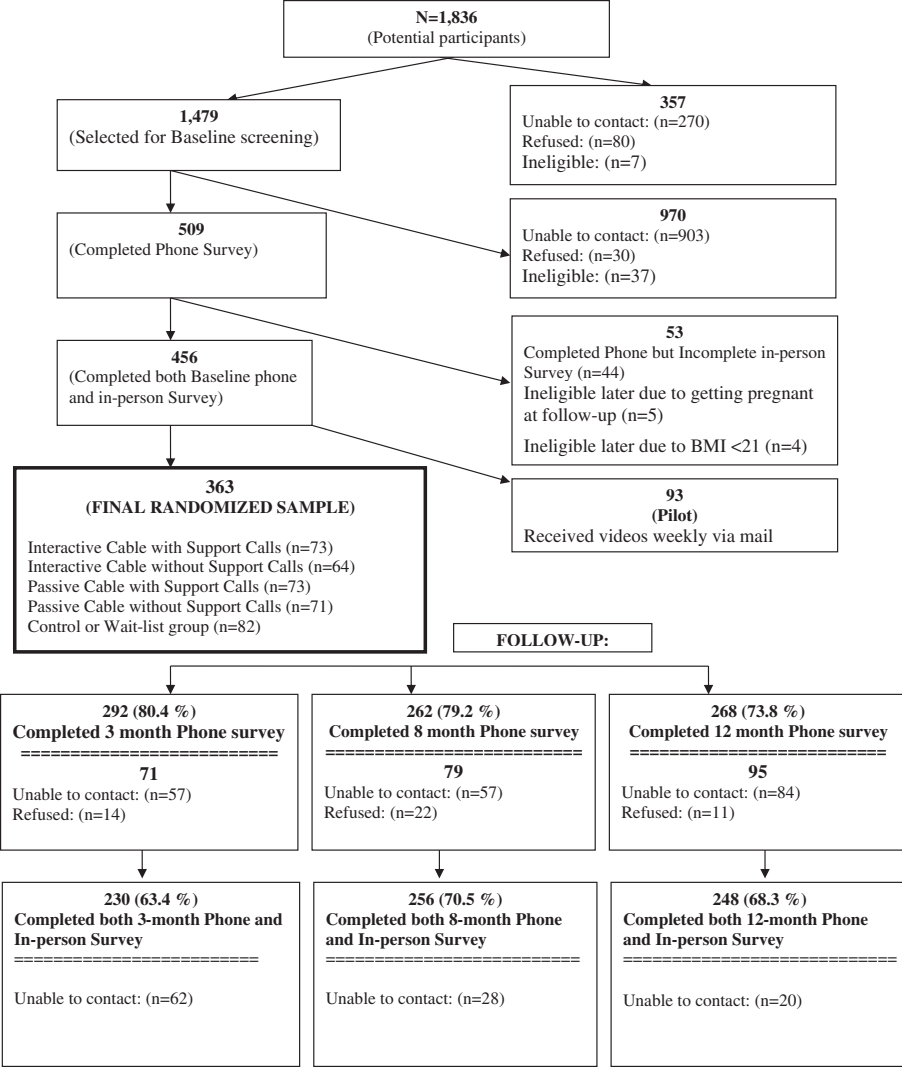

Supplement: 12966_2012_828_MOESM2_ESM.pdf [file 12966_2012_828_MOESM2_ESM.pdf]
